# Supplementary material for: A pilot study about microplastics and mesoplastics in an Antarctic glacier
Source: Copernicus journal article supplement (doi:10.5194/tc-15-2531-2021), 2021-06-03
Supplement: Supplementary file 1 [file tc-15-2531-2021-supplement.pdf]

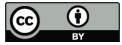

*Supplement of*

## **A pilot study about microplastics and mesoplastics in an Antarctic glacier**

**Miguel González-Pleiter et al.**

*Correspondence to:* Miguel González-Pleiter ([mig.gonzalez@uam.es](mailto:mig.gonzalez@uam.es)) and Franco Teixeira-de-Mello ([frantei@fcien.edu.uy](mailto:frantei@fcien.edu.uy))

The copyright of individual parts of the supplement might differ from the article licence.

A

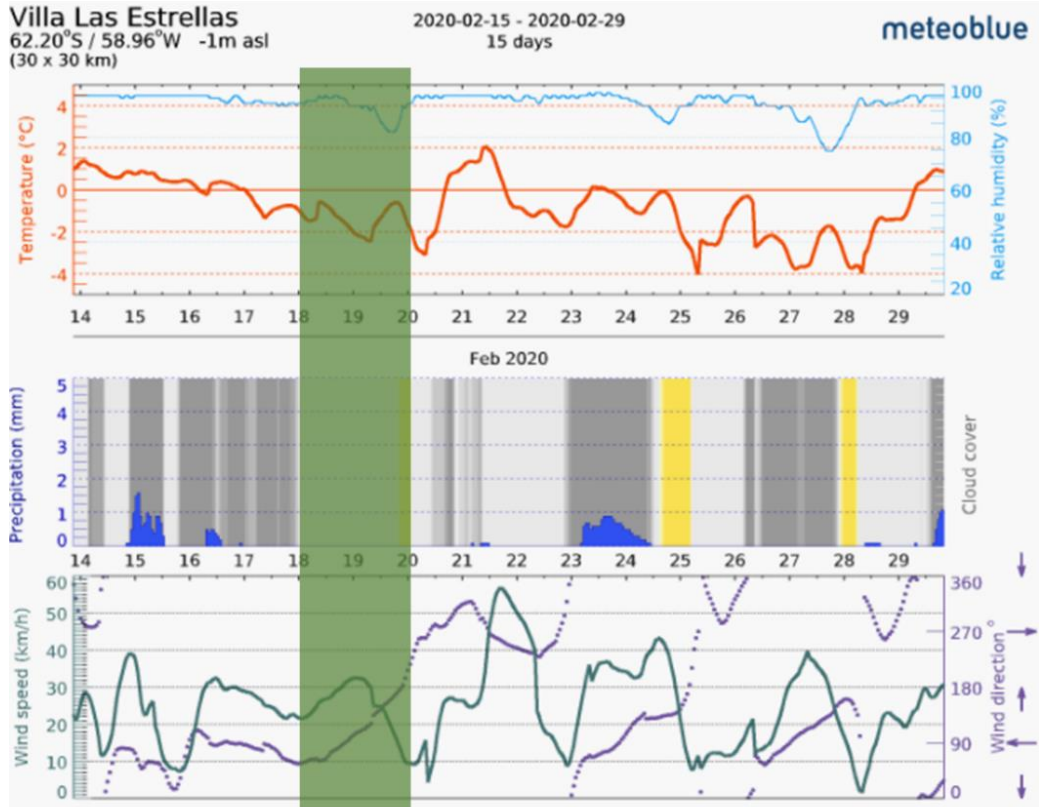

B

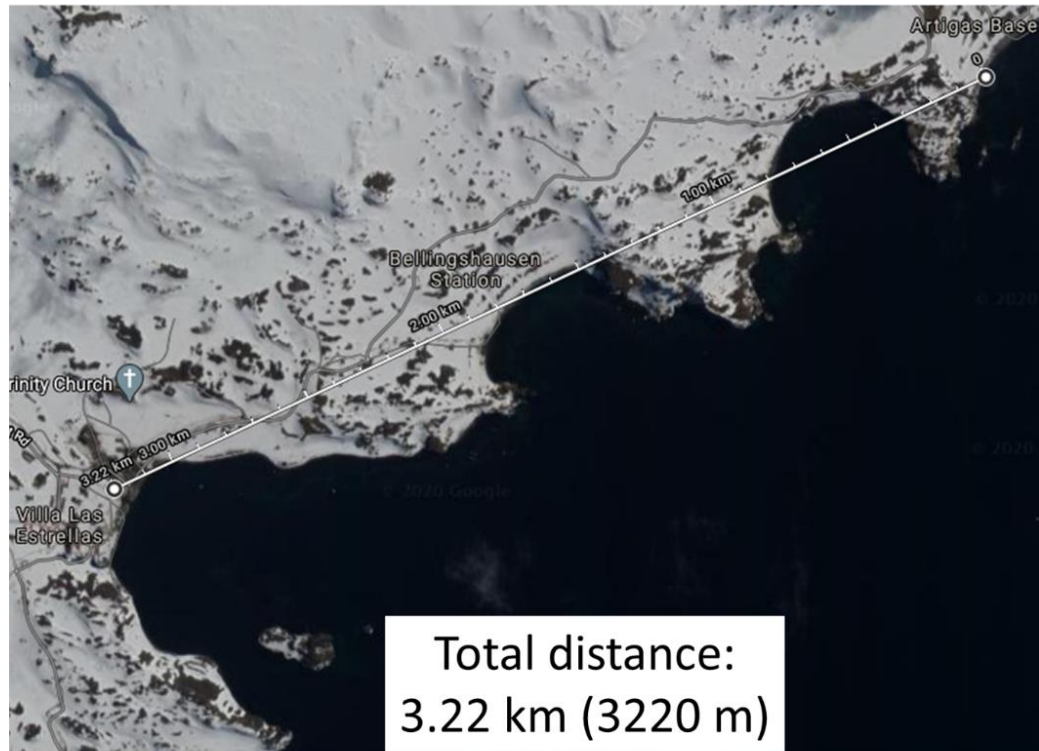

29  
30  
31  
32  
33  
34

**Figure S1.** Weather conditions in *Villa Las Estrellas*, during February 2020 based on the available information we had access to (i.e. *La Villa de la Estrellas*, *Fildes Peninsula climatological information*) (A), green rectangle indicates the study period (18/02/2020 and 20/02/2020), and (B) the distance between *Villa Las Estrellas* and Artigas Beach (source: © Google Maps).

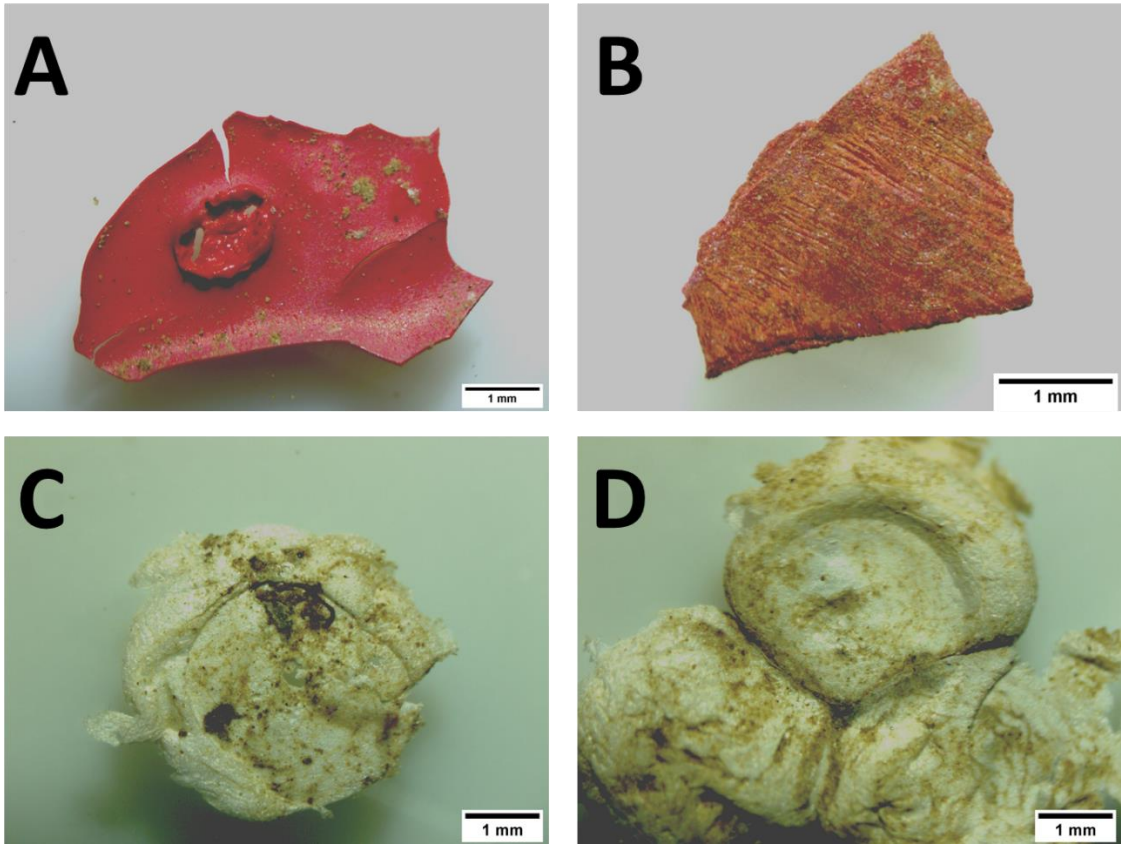

36  
37  
38  
39  
40  
41  
42  
43  
44  
45  
46  
47  
48  
49  
50  
51  
52  
53  
54  
55  
56  
57  
58  
59

**Figure S2.** Representative photos of the plastics found on the ice surface close to Uruguay lake (top) and Ionosferico lake (bottom).

60 **Table S1.** Characteristics of plastics found into the squares used for the assessment of plastic  
 61 concentration on ice surface close to Uruguay lake and close to Ionosferico lake that constitute  
 62 part of the ablation zone of Collins Glacier in Maxwell Bay in King George Island (Antarctica).

| Area        | ID Square | Polymer                                                   | Color | Size 1 (µm) | Size 2 (µm) | Type         |
|-------------|-----------|-----------------------------------------------------------|-------|-------------|-------------|--------------|
| Uruguay     | 1         | EPS                                                       | White | 4100        | 4022        | Microplastic |
| Uruguay     | 1         | Polyester                                                 | Red   | 4822        | 2544        | Microplastic |
| Uruguay     | 2         | Polyester                                                 | Red   | 6662        | 3747        | Macroplastic |
| Uruguay     | 3         | not detected                                              | -     | -           | -           | -            |
| Uruguay     | 4         | not detected                                              | -     | -           | -           | -            |
| Uruguay     | 5         | EPS                                                       | White | 12628       | 11334       | Macroplastic |
| Uruguay     | 6         | not detected                                              | -     | -           | -           | -            |
| Uruguay     | 7         | not detected                                              | -     | -           | -           | -            |
| Uruguay     | 8         | not detected                                              | -     | -           | -           | -            |
| Uruguay     | 9         | not detected                                              | -     | -           | -           | -            |
| Uruguay     | 10        | not detected                                              | -     | -           | -           | -            |
| Uruguay     | 11        | not detected                                              | -     | -           | -           | -            |
| Uruguay     | 12        | Polyester                                                 | Red   | 2292        | 1356        | Microplastic |
| Uruguay     | Mean      | 0.17 EPS/m <sup>2</sup> and 0.25 Polyester/m <sup>2</sup> |       |             |             |              |
| Ionosferico | 1         | EPS                                                       | White | 7583        | 5591        | Macroplastic |
| Ionosferico | 2         | not detected                                              | -     | -           | -           | -            |
| Ionosferico | 3         | not detected                                              | -     | -           | -           | -            |
| Ionosferico | 4         | not detected                                              | -     | -           | -           | -            |
| Ionosferico | 5         | EPS                                                       | White | 3817        | 3318        | Microplastic |
| Ionosferico | 6         | not detected                                              | -     | -           | -           | -            |
| Ionosferico | Mean      | 0.33 EPS/m <sup>2</sup>                                   |       |             |             |              |

63  
 64  
 65  
 66  
 67  
 68  
 69  
 70  
 71  
 72  
 73  
 74  
 75  
 76  
 77  
 78  
 79  
 80

81 **Table S2.** Characteristics of plastics found at the end of the experiment into the squares used  
 82 for the assessment of atmospheric dry deposition of plastics on ice surfaces that constitute part  
 83 of the ablation zone of Collins Glacier (King George Island, Antarctica).

| Area        | ID Square | Polymer      | Color | Size 1 ( $\mu\text{m}$ ) | Size 2 ( $\mu\text{m}$ ) | Type         |
|-------------|-----------|--------------|-------|--------------------------|--------------------------|--------------|
| Uruguay     | 1         | EPS          | White | 4100                     | 4022                     | Microplastic |
| Uruguay     | 1         | Polyester    | Red   | 4822                     | 2544                     | Microplastic |
| Uruguay     | 2*        | Polyurethane | Brown | > 5000                   | > 5000                   | Macroplastic |
| Uruguay     | 3*        | EPS          | White | 9301                     | 8265                     | Macroplastic |
| Uruguay     | 4*        | Polyester    | Red   | 6989                     | 6834                     | Macroplastic |
| Uruguay     | 4*        | Polyester    | Red   | 6168                     | 5891                     | Macroplastic |
| Uruguay     | 4*        | Polyester    | Red   | 5909                     | 501                      | Macroplastic |
| Uruguay     | 4*        | Polyester    | White | > 5000                   | > 5000                   | Macroplastic |
| Uruguay     | 5         | EPS          | White | 12628                    | 11334                    | Macroplastic |
| Uruguay     | 6*        | EPS          | White | 9720                     | 7963                     | Macroplastic |
| Uruguay     | 6*        | EPS          | White | 6292                     | 5567                     | Macroplastic |
| Uruguay     | 6*        | EPS          | White | 9192                     | 9023                     | Macroplastic |
| Uruguay     | 6*        | EPS          | White | 5595                     | 4574                     | Macroplastic |
| Uruguay     | 6*        | EPS          | White | 7847                     | 3640                     | Macroplastic |
| Ionosferico | 1         | EPS          | White | 7583                     | 5591                     | Macroplastic |
| Ionosferico | 2*        | EPS          | White | 6437                     | 5220                     | Macroplastic |
| Ionosferico | 2*        | EPS          | White | 10932                    | 7572                     | Macroplastic |
| Ionosferico | 2*        | EPS          | White | 5278                     | 4726                     | Macroplastic |
| Ionosferico | 2*        | EPS          | White | 9363                     | 9186                     | Macroplastic |
| Ionosferico | 3*        | EPS          | White | 9209                     | 7932                     | Macroplastic |
| Ionosferico | 3*        | EPS          | White | 7946                     | 3834                     | Macroplastic |
| Ionosferico | 3*        | EPS          | White | 13155                    | 7925                     | Macroplastic |
| Ionosferico | 4*        | EPS          | White | 7007                     | 6905                     | Macroplastic |
| Ionosferico | 4*        | EPS          | White | 7094                     | 5112                     | Macroplastic |
| Ionosferico | 4*        | EPS          | White | 16737                    | 16085                    | Macroplastic |
| Ionosferico | 5         | EPS          | White | 3817                     | 3318                     | Microplastic |
| Ionosferico | 6*        | EPS          | White | 11576                    | 11105                    | Macroplastic |

84 Asterisks indicate squares different from those used for the assessment of plastic concentration.

85

86
